# Supplementary material for: Nutritional status modulates box C/D snoRNP biogenesis by regulated subcellular relocalization of the R2TP complex
Source: PubMed Central journal article supplement (PMC4165372; doi:10.1186/s13059-014-0404-4), 2014-07-25

Nutrition

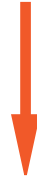

TOR pathway

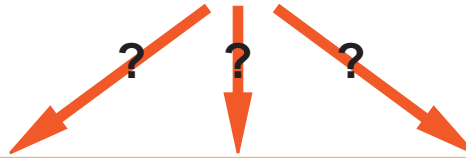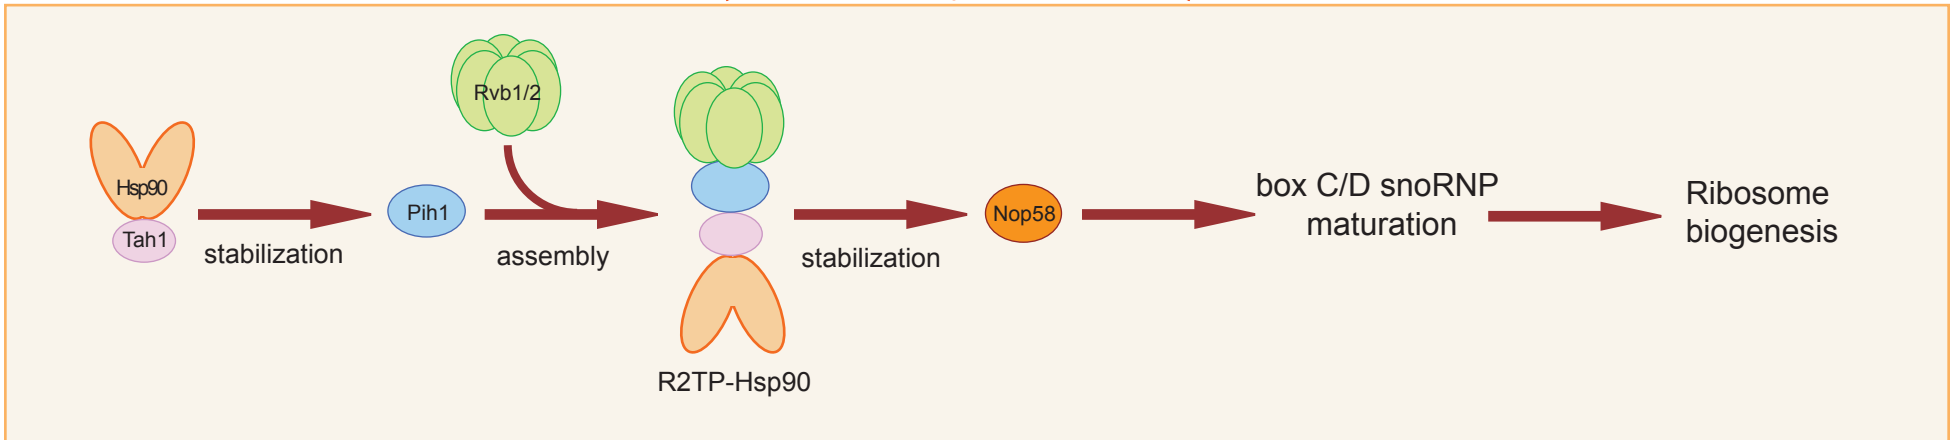

Supplement: 13059_2014_404_MOESM6_ESM.pdf [file 13059_2014_404_MOESM6_ESM.pdf]
